# Supplementary material
Source: publisher figshare collection journal article supplement (https://sage.figshare.com/ndownloader/files/22090044)
Supplement: Supplementary file 1 [file 22090044]

## Supplemental material:

### Uric acid distribution volume calculated by kinetic modeling and extracellular volume predicted by bioimpedance method

#### Correlations between uric acid distribution volume and cardio-thoracic ratio, and between extracellular volume predicted by bioimpedance analysis method and cardio-thoracic ratio

Cardio-thoracic ratio (CTR) is another indicator of hydration status of hemodialysis (HD) patients. Therefore, we examined correlations between uric acid (UA) distribution volume (UDiV) and CTR, and between extracellular volume (ECV) predicted by bioimpedance analysis (BIA) method (BIA-ECV) and CTR in the 53 patients. The CTR was measured on a chest radiograph taken within two weeks prior to measurements of UDiV and BIA-ECV.

As shown on Figure S1, there was no significant correlation between UDiV and CTR nor BIA-ECV and CTR. Incidentally, no significant difference was exhibited between post-dialysis body weight at the time of UDiV and BIA-ECV measurements and post-dialysis body weight at the time of CTR measurement.

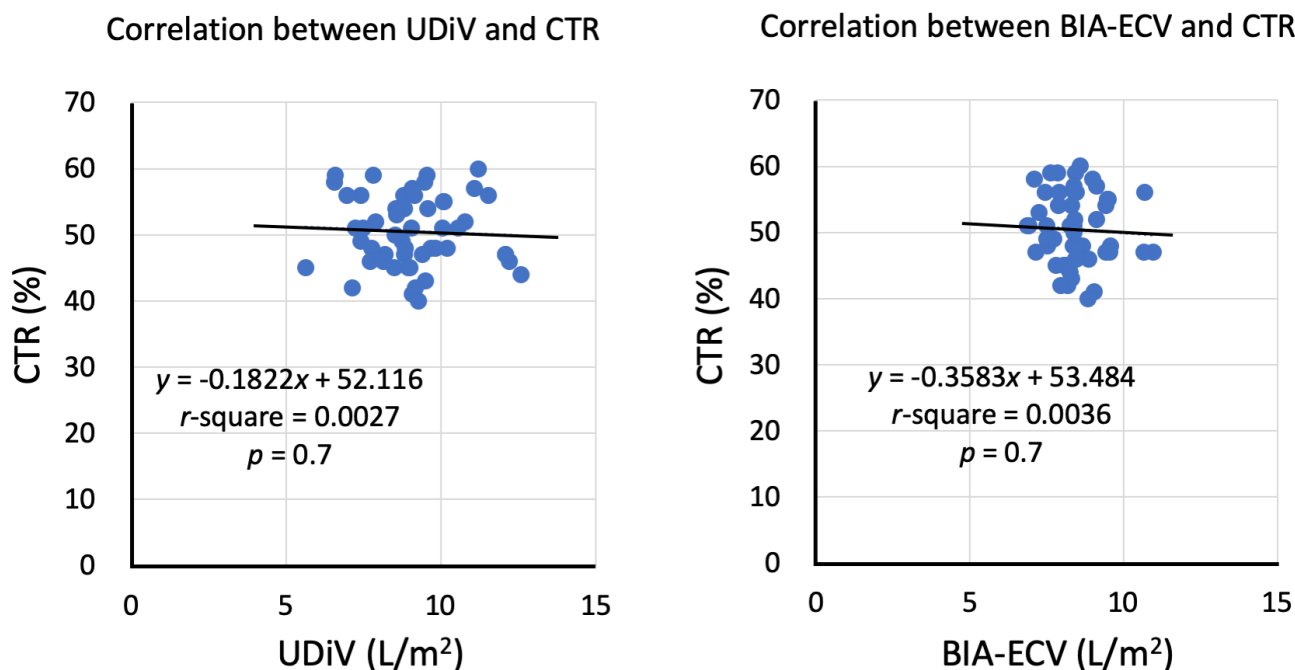

**Figure S1**

Correlations between UDiV and CTR, and between BIA-ECV and CTR.
